# Supplementary material for: Teaching Through Television: Experimental Evidence on Entrepreneurship Education in Tanzania
Source: Atypon-hosted journal article supplement (doi:10.1287/mnsc.2019.3321), 2019-12-12
Supplement: mnsc.2019.3321.sm1.pdf [file mnsc.2019.3321.sm1.pdf]

# Teaching through television: Experimental evidence on entrepreneurship education in Tanzania\*

## Online Appendix A

Kjetil Bjorvatn†      Alexander W. Cappelen†  
Linda Helgesson Sekei‡      Erik Ø. Sørensen†  
Bertil Tungodden†

February 12, 2019

We here provide complementary analysis, as referred to in the main text.

### List of Figures

|    |                                                                                   |    |
|----|-----------------------------------------------------------------------------------|----|
| A1 | Distributions of gender composition by treatment . . . . .                        | 3  |
| A2 | Treatments effect on willingness to take risk (alternative definitions) . . . . . | 4  |
| A3 | Treatment effects on patience (alternative definitions) . . . . .                 | 5  |
| A4 | Robustness of standard error methodology . . . . .                                | 6  |
| A5 | Bounds on impact of exposure to edutainment show . . . . .                        | 7  |
| A6 | Bounds on impact on ambitions . . . . .                                           | 8  |
| A7 | Bounds on impact on knowledge . . . . .                                           | 9  |
| A8 | Bounds on impact on mind-set . . . . .                                            | 10 |

---

\*We are grateful to Britta Augsburg, Michal Bauer, Ola Kvaløy, Pieter Serneels, Robert Sugden, Dean Yang, and an anonymous referee for value comments and suggestions, and to Rashid Chuachua, Goodluck Urassa, Tumaini Guatalile, Mari Jørgensen, Frank Lugembe, Juda Lyamai, Rajab Masawila, Said Mohamed, Izack B. Msenga, Derick Muta, Issa Mtuwa, Mwachi Mutahaba, Alex Mwamsamali, Ana Santos, and Marianne Tønnsberg for excellent research assistance. In particular, we thank Minou Fuglesang and the team at Femina HIP for immense support and invaluable discussions. The project was financed by the Research Council of Norway through its Centres of Excellence Scheme, FAIR project No 262675, research grants 185831 and 250170/F10; it was administered by The Choice Lab, NHH Norwegian School of Economics and Development Pioneer Consultants. Tungodden acknowledges support from Christian Michelsen Institute, Bergen; Sørensen from ESOP, University of Oslo. †Department of Economics, NHH Norwegian School of Economics, Bergen, Norway; ‡NIRAS Tanzania, Dar es Salaam, Tanzania. Emails: alexander.cappelen@nhh.no, kjetil.bjorvatn@nhh.no, LSE@niras.com, erik.sorensen@nhh.no, bertil.tungodden@nhh.no.

|    |                                                  |    |
|----|--------------------------------------------------|----|
| A9 | Bounds on impact on long-term outcomes . . . . . | 11 |
|----|--------------------------------------------------|----|

## List of Tables

|     |                                                                                              |    |
|-----|----------------------------------------------------------------------------------------------|----|
| A1  | Treatment-Control Balance (males) . . . . .                                                  | 12 |
| A2  | Treatment-Control Balance (females) . . . . .                                                | 13 |
| A3  | Treatment-Control Balance (lab sample) . . . . .                                             | 14 |
| A4  | Treatment-Control Balance (admin sample) . . . . .                                           | 15 |
| A5  | Treatment-Control Balance (long term sample) . . . . .                                       | 16 |
| A6  | Impact on exposure to the edutainment show, overall impact, full model                       | 17 |
| A7  | Impact on exposure to the edutainment show, gender specific effects,<br>full model . . . . . | 18 |
| A8  | Impact on ambitions, overall impact, full model . . . . .                                    | 19 |
| A9  | Impact on ambitions, gender specific impact, full model . . . . .                            | 20 |
| A10 | Impact on knowledge, overall impact, full model . . . . .                                    | 21 |
| A11 | Impact on knowledge, gender specific impact, full model . . . . .                            | 22 |
| A12 | Impact on mind-set, overall impact, full model . . . . .                                     | 23 |
| A13 | Impact on mind-set, gender specific impact, full model . . . . .                             | 24 |
| A14 | Mind-set: Ordered probit models of risk-taking . . . . .                                     | 25 |
| A15 | Mind-set: Ordered probit models of patience . . . . .                                        | 26 |
| A16 | Long-term behavior, overall impact, full model . . . . .                                     | 27 |
| A17 | Long-term behavior, gender specific impact, full model . . . . .                             | 28 |
| A18 | Impact on social preferences . . . . .                                                       | 29 |
| A19 | Impact on social preferences, overall impact, full models . . . . .                          | 30 |
| A20 | Impact on social preferences, gender-specific impact, full models . . . . .                  | 31 |

# 1 Additional figures

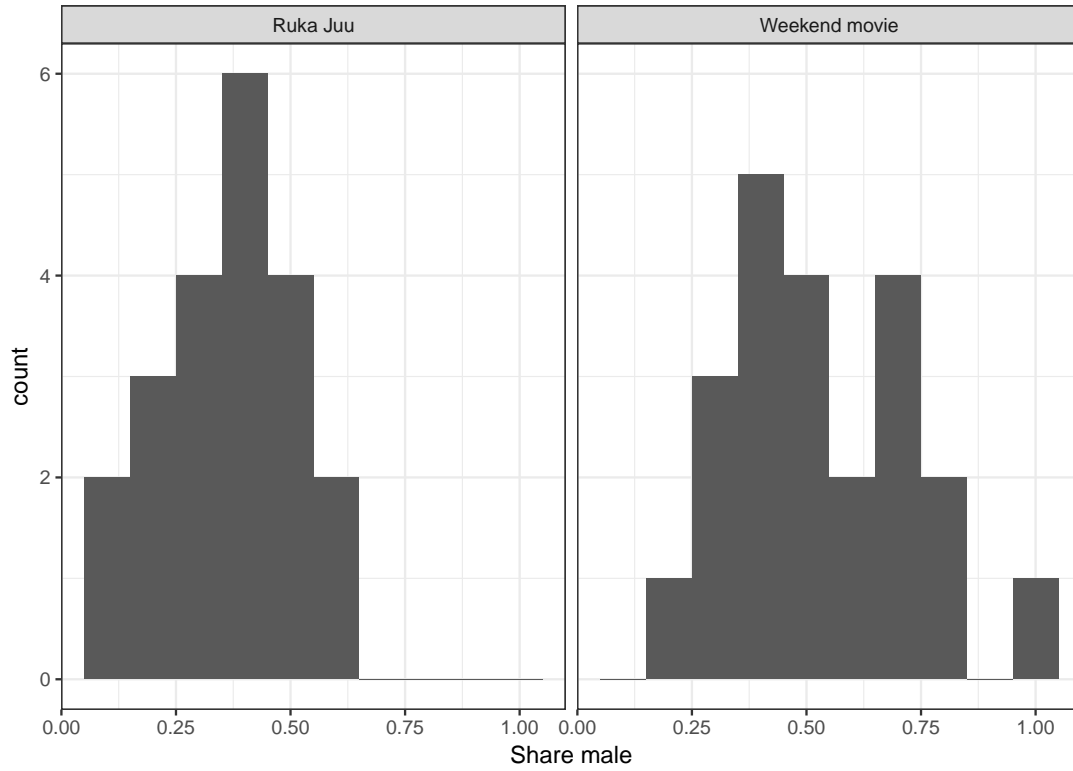

**Figure A1:** Distributions of gender composition by treatment  
*Note:* Histograms of the share of males at each school by treatment.

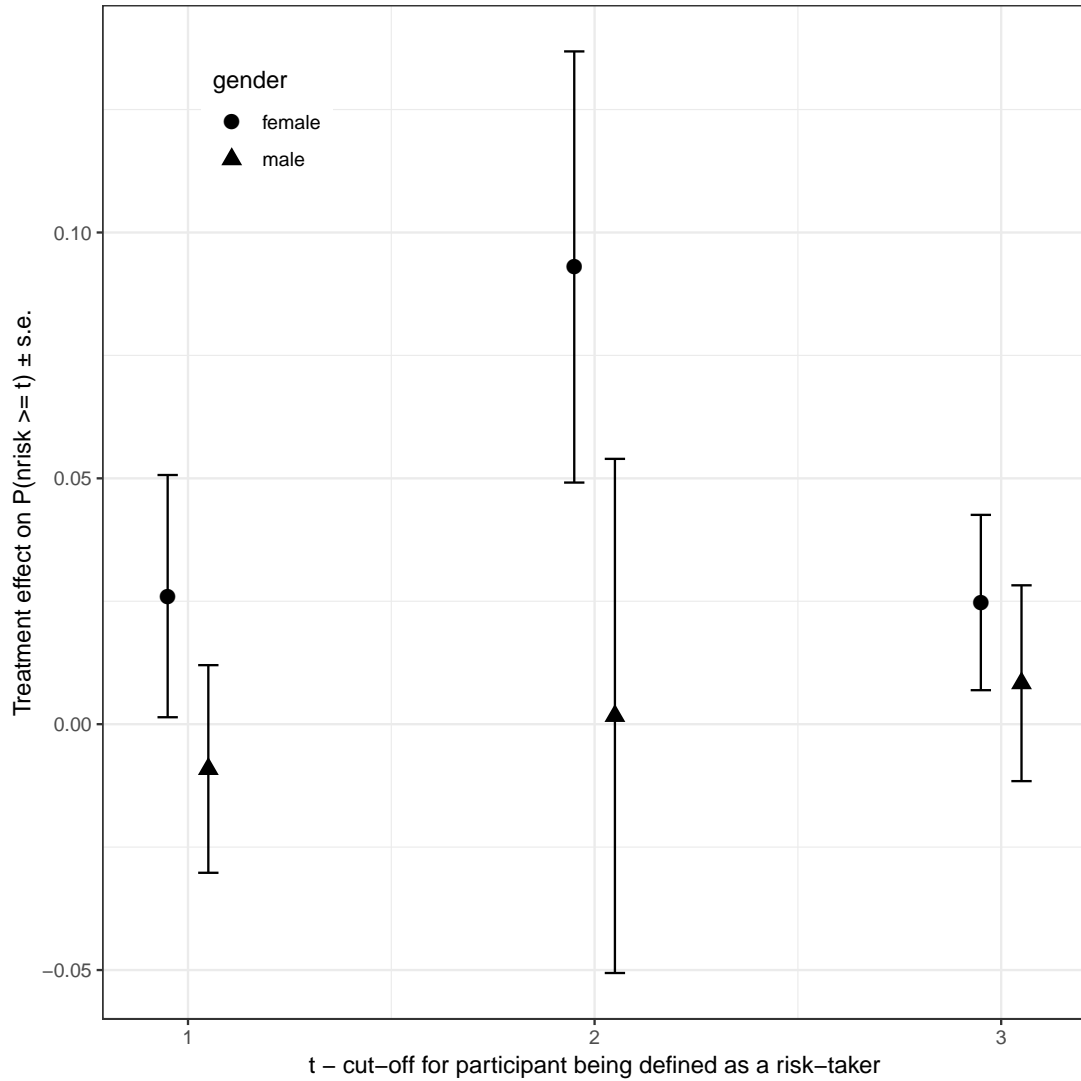

**Figure A2:** Treatments effect on willingness to take risk (alternative definitions)  
*Note:* The figure reports the treatment effects for males and females on risk for alternative definitions of the willingness to take risk. The willingness to take risk is here defined by an indicator variable that takes the value one if the participant chooses the risky alternative at least 1/2/3 times.

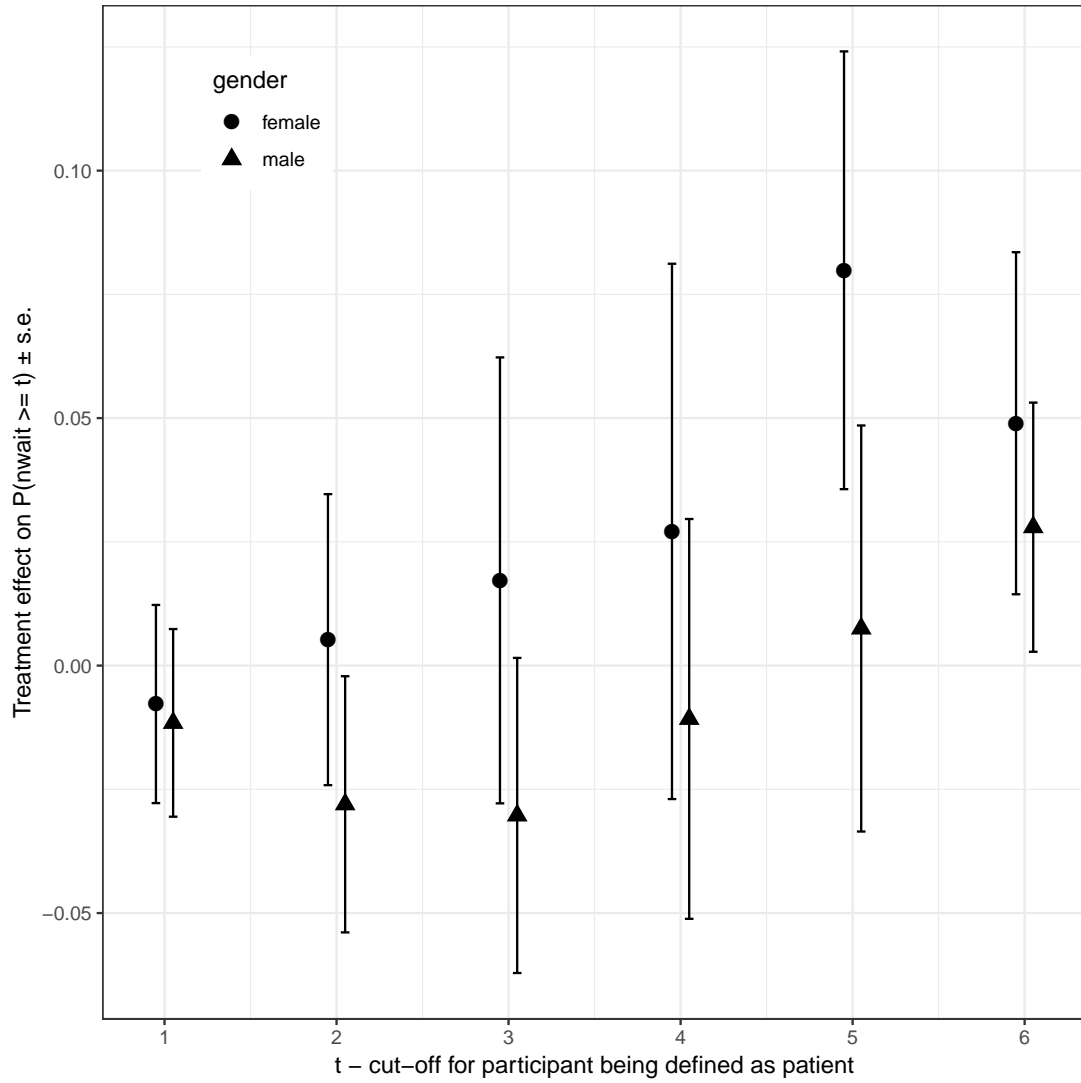

**Figure A3:** Treatment effects on patience (alternative definitions)

*Note:* The figure reports the treatment effects for males and females on patience for alternative definitions. Patience is here defined by an indicator variable that takes the value one if the participant chooses the later payment date at least 1/2/3/4/5/6 times.

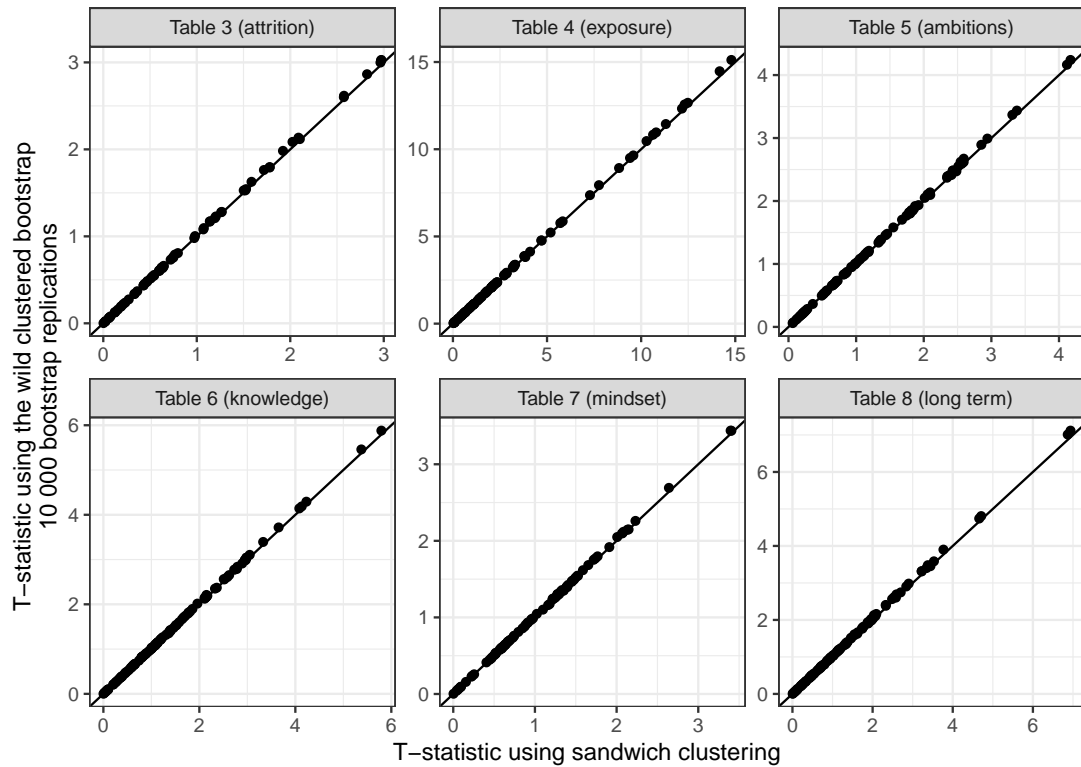

**Figure A4:** Robustness of standard error methodology

*Note:* The figure reports absolute values of t-statistics of the regression coefficients in Tables 3–8 (except for the constant term in each regression). The 45-degree line is included for reference, and we see that the choice of method for calculating standard errors is not important for any substantial conclusions – and that if anything, the wild clustered bootstrap t-stats tend to fall marginally above the 45 degree line, indicating that the reported clustered sandwich standard errors represent a marginally conservative approach).

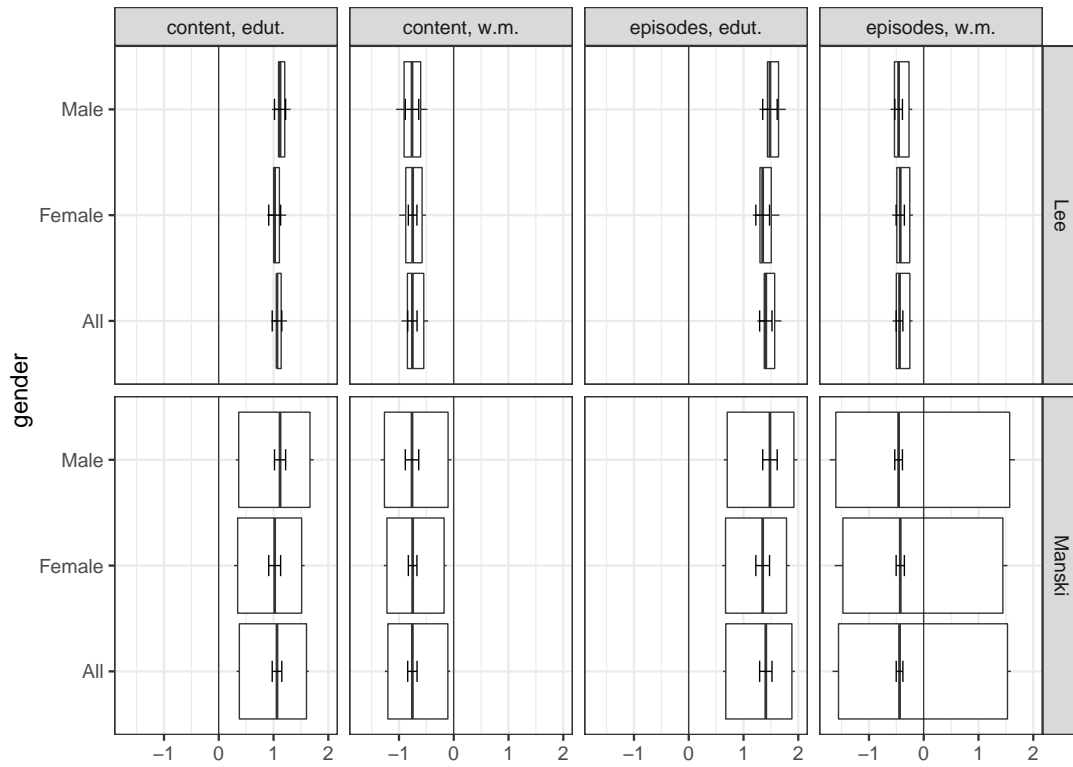

**Figure A5:** Bounds on impact of exposure to edutainment show

*Note:* Bounds on the treatment effects presented in Table 4. In each panel, the box represents the point estimates of the lower and upper bounds, with a vertical line inside the box representing the estimated mean treatment effect (without control variables). Error bars are indicated for the mean treatment effect (standard errors clustered at the school level). On each side of the box, one standard error is indicated, calculated using 1000 bootstrap replications clustered at the school level. The upper row of panels are estimated using the Lee (2009) approach, which assumes that treatment has a monotone effect on attrition. The lower row of panels are estimated present bounds that only assume the bounded support of the missing outcomes (Manski, 1990).

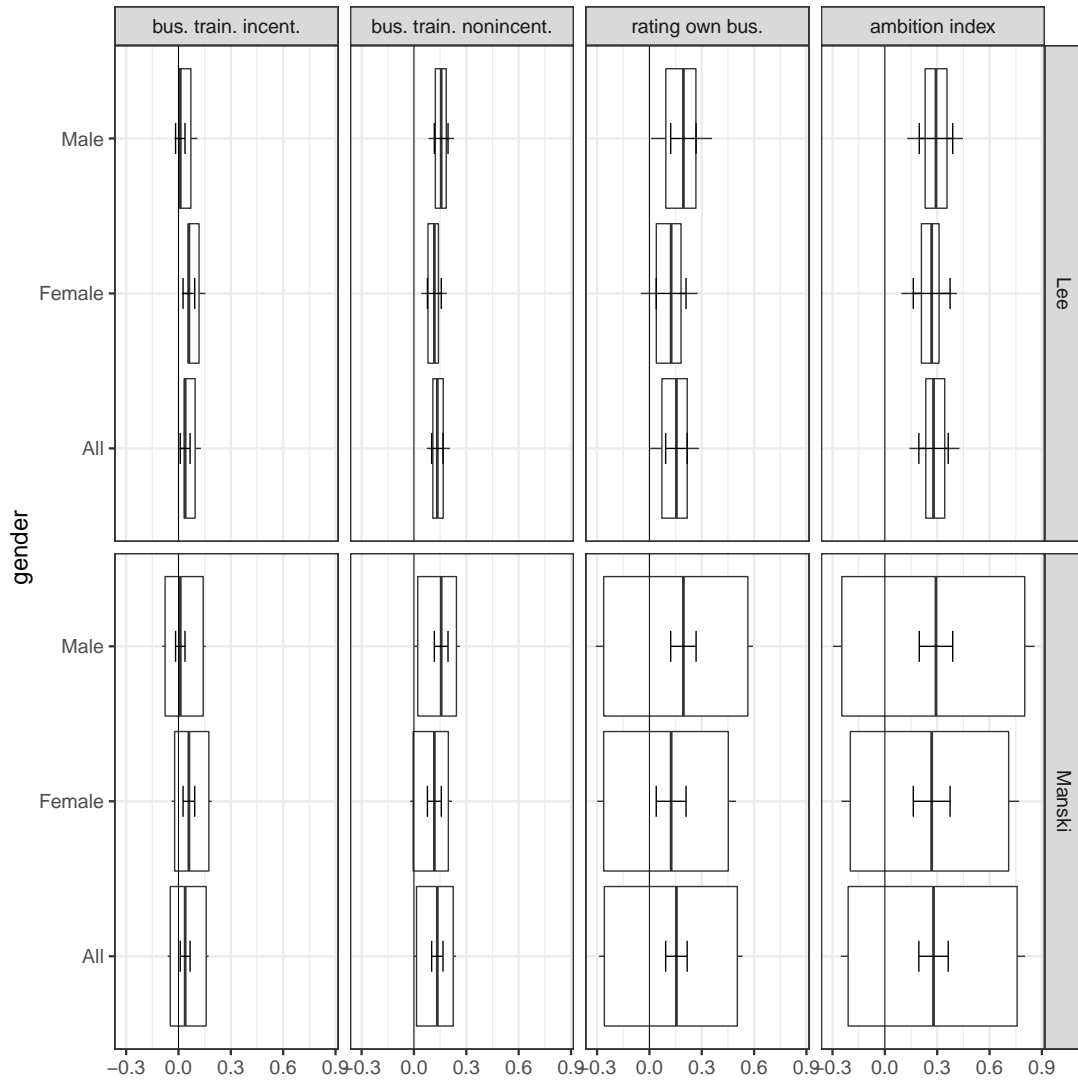

**Figure A6: Bounds on impact on ambitions**

*Note:* Bounds on the treatment effects presented in Table 5. In each panel, the box represents the point estimates of the lower and upper bounds, with a vertical line inside the box representing the estimated mean treatment effect (without control variables). Error bars are indicated for the mean treatment effect (standard errors clustered at the school level). On each side of the box, one standard error is indicated, calculated using 1000 bootstrap replications clustered at the school level. The upper row of panels are estimated using the Lee (2009) approach, which assumes that treatment has a monotone effect on attrition. The lower row of panels are estimated present bounds that only assume the bounded support of the missing outcomes (Manski, 1990).

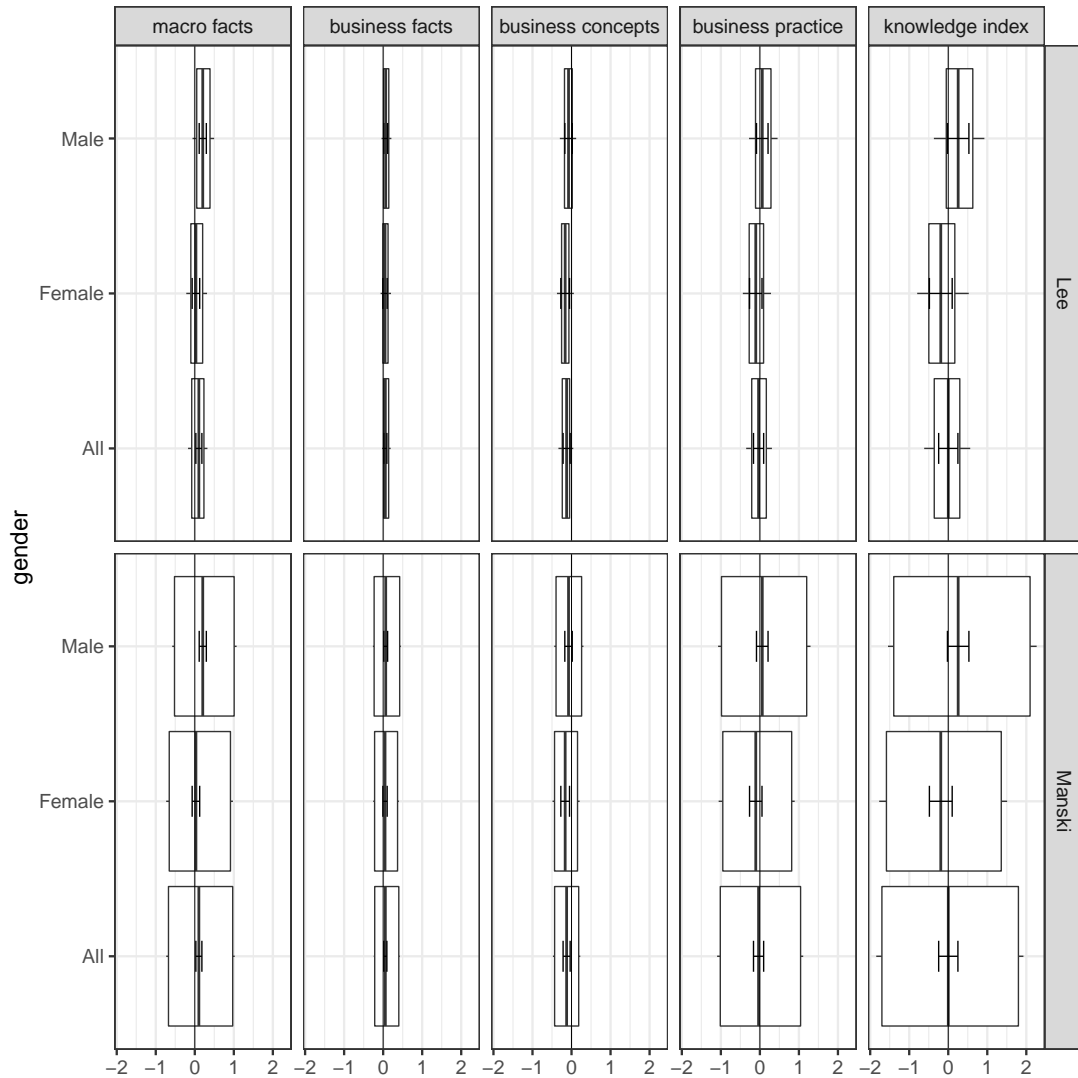

**Figure A7: Bounds on impact on knowledge**

*Note:* Bounds on the treatment effects presented in Table 6. In each panel, the box represents the point estimates of the lower and upper bounds, with a vertical line inside the box representing the estimated mean treatment effect (without control variables). Error bars are indicated for the mean treatment effect (standard errors clustered at the school level). On each side of the box, one standard error is indicated, calculated using 1000 bootstrap replications clustered at the school level. The upper row of panels are estimated using the Lee (2009) approach, which assumes that treatment has a monotone effect on attrition. The lower row of panels are estimated present bounds that only assume the bounded support of the missing outcomes (Manski, 1990).

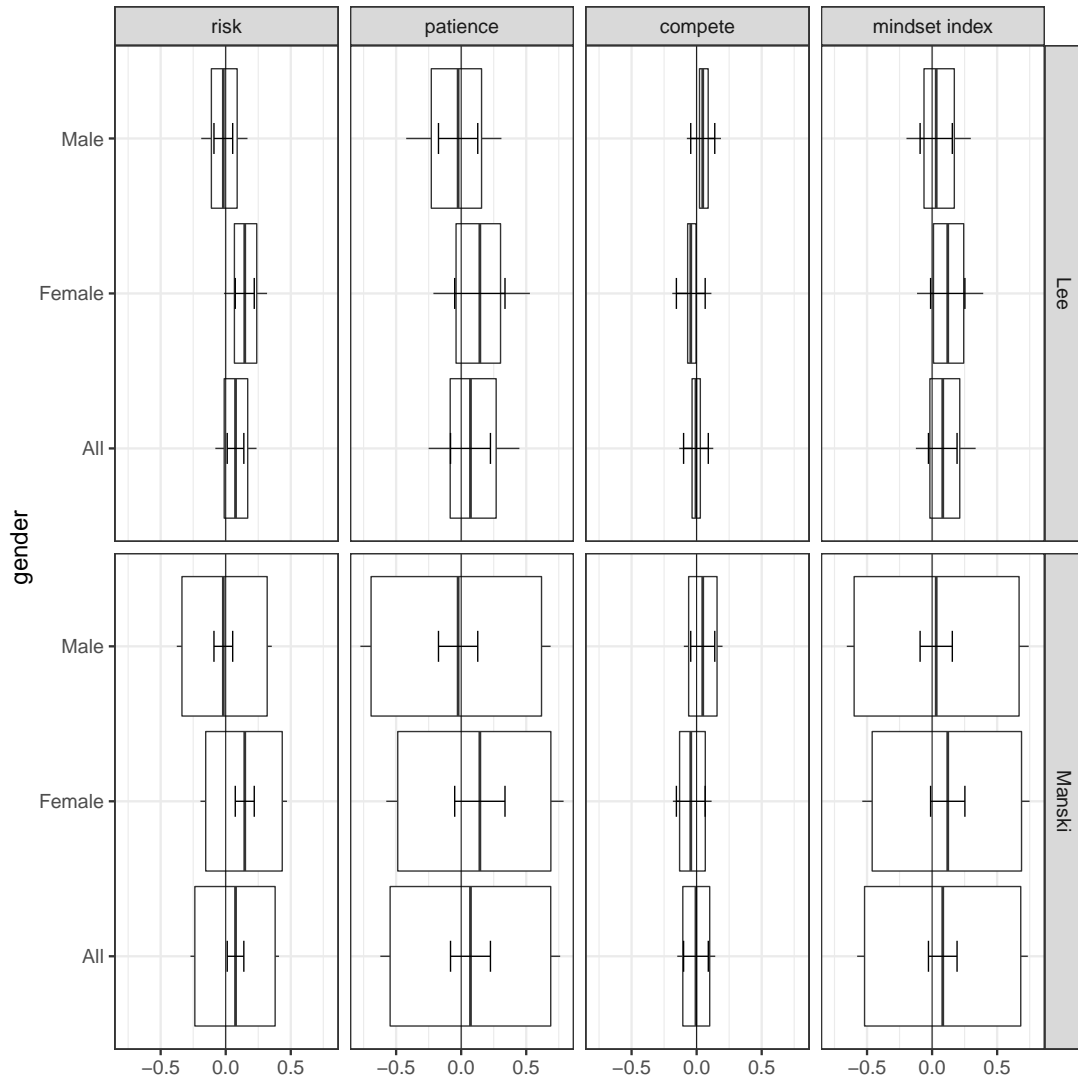

**Figure A8: Bounds on impact on mind-set**

*Note:* Bounds on the treatment effects presented in Table 7. In each panel, the box represents the point estimates of the lower and upper bounds, with a vertical line inside the box representing the estimated mean treatment effect (without control variables). Error bars are indicated for the mean treatment effect (standard errors clustered at the school level). On each side of the box, one standard error is indicated, calculated using 1000 bootstrap replications clustered at the school level. The upper row of panels are estimated using the Lee (2009) approach, which assumes that treatment has a monotone effect on attrition. The lower row of panels are estimated present bounds that only assume the bounded support of the missing outcomes (Manski, 1990).

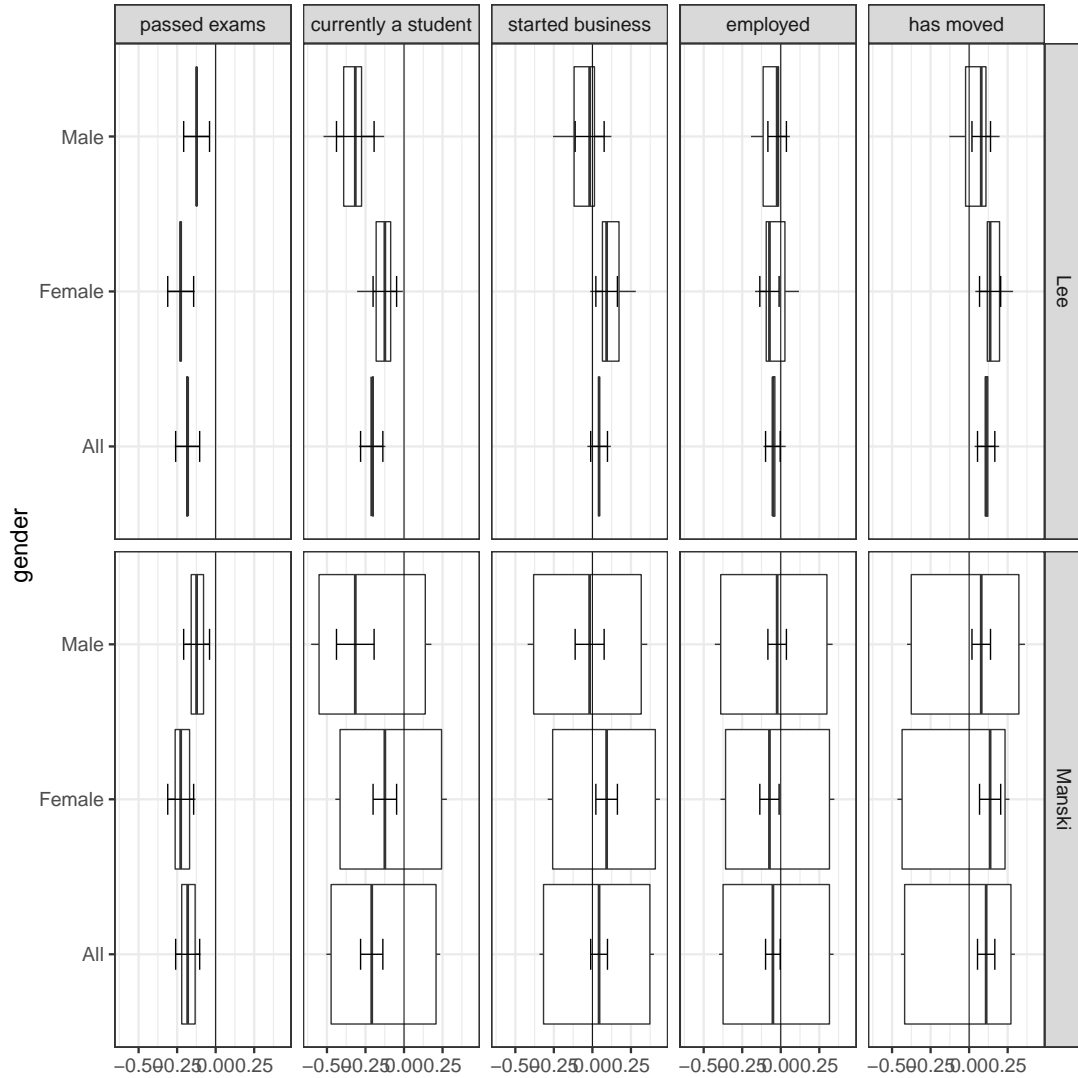

**Figure A9: Bounds on impact on long-term outcomes**

*Note:* Bounds on the treatment effects presented in Table 8. In each panel, the box represents the point estimates of the lower and upper bounds, with a vertical line inside the box representing the estimated mean treatment effect (without control variables). Error bars are indicated for the mean treatment effect (standard errors clustered at the school level) On each side of the box, one standard error is indicated, calculated using 1000 bootstrap replications clustered at the school level. The upper row of panels are estimated using the Lee (2009) approach, which assumes that treatment has a monotone effect on attrition. The lower row of panels are estimated present bounds that only assume the bounded support of the missing outcomes (Manski, 1990).

## 2 Additional tables

**Table A1:** Treatment-Control Balance (males)

|                                 | Treatment status  |                   |                   | Difference        | <i>p</i> -value |
|---------------------------------|-------------------|-------------------|-------------------|-------------------|-----------------|
|                                 | All               | Control           | Treated           |                   |                 |
| Age                             | 18.279<br>(0.079) | 18.287<br>(0.091) | 18.268<br>(0.148) | -0.019<br>(0.172) | 0.913           |
| Household with no parents       | 0.258<br>(0.014)  | 0.236<br>(0.018)  | 0.292<br>(0.022)  | 0.056<br>(0.028)  | 0.046           |
| Access to TV                    | 3.415<br>(0.062)  | 3.381<br>(0.094)  | 3.468<br>(0.069)  | 0.087<br>(0.115)  | 0.448           |
| Business stream                 | 0.296<br>(0.067)  | 0.238<br>(0.081)  | 0.385<br>(0.112)  | 0.147<br>(0.137)  | 0.283           |
| Business knowledge              | 0.234<br>(0.020)  | 0.271<br>(0.027)  | 0.178<br>(0.023)  | -0.094<br>(0.035) | 0.008           |
| Business ambitions              | 0.143<br>(0.014)  | 0.126<br>(0.017)  | 0.170<br>(0.025)  | 0.044<br>(0.030)  | 0.140           |
| O-level failure rate for school | 0.573<br>(0.025)  | 0.582<br>(0.027)  | 0.559<br>(0.050)  | -0.024<br>(0.056) | 0.668           |
| Number of schools               | 43                | 22                | 21                |                   |                 |
| Number of individuals           | 949               | 572               | 377               |                   |                 |

*Note:* For details, see Table 2. Joint *p*-value of the explanatory variables in a regression predicting treatment on background variables:  $p < 0.001$ .

**Table A2:** Treatment-Control Balance (females)

|                                 | Treatment status  |                   |                   | Difference        | <i>p</i> -value |
|---------------------------------|-------------------|-------------------|-------------------|-------------------|-----------------|
|                                 | All               | Control           | Treated           |                   |                 |
| Age                             | 17.624<br>(0.052) | 17.561<br>(0.068) | 17.676<br>(0.077) | 0.116<br>(0.101)  | 0.253           |
| Household with no parents       | 0.257<br>(0.011)  | 0.225<br>(0.015)  | 0.283<br>(0.014)  | 0.058<br>(0.021)  | 0.005           |
| Access to TV                    | 3.396<br>(0.062)  | 3.318<br>(0.108)  | 3.460<br>(0.067)  | 0.143<br>(0.125)  | 0.256           |
| Business stream                 | 0.452<br>(0.078)  | 0.462<br>(0.120)  | 0.444<br>(0.105)  | -0.018<br>(0.157) | 0.911           |
| Business knowledge              | 0.276<br>(0.024)  | 0.307<br>(0.038)  | 0.249<br>(0.031)  | -0.058<br>(0.049) | 0.232           |
| Business ambitions              | 0.094<br>(0.012)  | 0.088<br>(0.013)  | 0.099<br>(0.019)  | 0.012<br>(0.023)  | 0.620           |
| O-level failure rate for school | 0.555<br>(0.022)  | 0.565<br>(0.026)  | 0.547<br>(0.035)  | -0.018<br>(0.043) | 0.670           |
| Number of schools               | 42                | 21                | 21                |                   |                 |
| Number of individuals           | 1183              | 537               | 646               |                   |                 |

*Note:* For details, see Table 2. Joint *p*-value of the explanatory variables in a regression predicting treatment on background variables:  $p = 0.013$ .

**Table A3:** Treatment-Control Balance (lab sample)

|                                 | All               | Treatment status  |                   | Difference        | <i>p</i> -value |
|---------------------------------|-------------------|-------------------|-------------------|-------------------|-----------------|
|                                 |                   | Control           | Treated           |                   |                 |
| Male                            | 0.444<br>(0.028)  | 0.513<br>(0.037)  | 0.365<br>(0.035)  | -0.148<br>(0.050) | 0.003           |
| Age                             | 17.910<br>(0.061) | 17.940<br>(0.078) | 17.875<br>(0.099) | -0.064<br>(0.125) | 0.606           |
| Household with no parents       | 0.254<br>(0.011)  | 0.229<br>(0.013)  | 0.283<br>(0.015)  | 0.054<br>(0.020)  | 0.006           |
| Access to TV                    | 3.408<br>(0.055)  | 3.348<br>(0.091)  | 3.477<br>(0.056)  | 0.129<br>(0.106)  | 0.222           |
| Business stream                 | 0.385<br>(0.073)  | 0.346<br>(0.104)  | 0.429<br>(0.104)  | 0.083<br>(0.145)  | 0.569           |
| Business knowledge              | 0.264<br>(0.020)  | 0.289<br>(0.030)  | 0.235<br>(0.027)  | -0.054<br>(0.040) | 0.173           |
| Business ambitions              | 0.108<br>(0.011)  | 0.101<br>(0.012)  | 0.116<br>(0.019)  | 0.015<br>(0.022)  | 0.493           |
| O-level failure rate for school | 0.564<br>(0.023)  | 0.572<br>(0.026)  | 0.554<br>(0.040)  | -0.019<br>(0.047) | 0.695           |
| Number of schools               | 43                | 22                | 21                |                   |                 |
| Number of individuals           | 1915              | 1025              | 890               |                   |                 |

*Note:* For details, see Table 2. Joint *p*-value of the explanatory variables in a regression predicting treatment on background variables:  $p < 0.001$ .

**Table A4:** Treatment-Control Balance (admin sample)

|                                 | Treatment status  |                   |                   | Difference        | <i>p</i> -value |
|---------------------------------|-------------------|-------------------|-------------------|-------------------|-----------------|
|                                 | All               | Control           | Treated           |                   |                 |
| Male                            | 0.447<br>(0.028)  | 0.518<br>(0.038)  | 0.369<br>(0.034)  | -0.149<br>(0.051) | 0.003           |
| Age                             | 17.910<br>(0.062) | 17.930<br>(0.080) | 17.888<br>(0.097) | -0.042<br>(0.124) | 0.733           |
| Household with no parents       | 0.258<br>(0.011)  | 0.230<br>(0.013)  | 0.288<br>(0.016)  | 0.057<br>(0.020)  | 0.005           |
| Access to TV                    | 3.408<br>(0.054)  | 3.358<br>(0.091)  | 3.461<br>(0.055)  | 0.103<br>(0.105)  | 0.325           |
| Business stream                 | 0.384<br>(0.072)  | 0.347<br>(0.104)  | 0.424<br>(0.103)  | 0.078<br>(0.144)  | 0.589           |
| Business knowledge              | 0.257<br>(0.019)  | 0.289<br>(0.027)  | 0.222<br>(0.026)  | -0.067<br>(0.037) | 0.071           |
| Business ambitions              | 0.113<br>(0.011)  | 0.104<br>(0.011)  | 0.123<br>(0.020)  | 0.019<br>(0.023)  | 0.406           |
| O-level failure rate for school | 0.565<br>(0.022)  | 0.577<br>(0.025)  | 0.552<br>(0.039)  | -0.025<br>(0.045) | 0.587           |
| Number of schools               | 43                | 22                | 21                |                   |                 |
| Number of individuals           | 2039              | 1059              | 980               |                   |                 |

*Note:* For details, see Table 2. Joint *p*-value of the explanatory variables in a regression predicting treatment on background variables:  $p < 0.001$ .

**Table A5:** Treatment-Control Balance (long term sample)

|                                 | All               | Treatment status  |                   | Difference        | <i>p</i> -value |
|---------------------------------|-------------------|-------------------|-------------------|-------------------|-----------------|
|                                 |                   | Control           | Treated           |                   |                 |
| Male                            | 0.447<br>(0.048)  | 0.486<br>(0.063)  | 0.406<br>(0.074)  | -0.081<br>(0.096) | 0.401           |
| Age                             | 18.063<br>(0.116) | 17.986<br>(0.128) | 18.145<br>(0.196) | 0.159<br>(0.231)  | 0.493           |
| Household with no parents       | 0.271<br>(0.024)  | 0.219<br>(0.031)  | 0.326<br>(0.034)  | 0.107<br>(0.045)  | 0.018           |
| Access to TV                    | 3.459<br>(0.086)  | 3.361<br>(0.148)  | 3.562<br>(0.081)  | 0.201<br>(0.167)  | 0.229           |
| Business stream                 | 0.363<br>(0.076)  | 0.342<br>(0.104)  | 0.384<br>(0.112)  | 0.042<br>(0.152)  | 0.784           |
| Business knowledge              | 0.254<br>(0.025)  | 0.247<br>(0.032)  | 0.261<br>(0.040)  | 0.014<br>(0.051)  | 0.778           |
| Business ambitions              | 0.106<br>(0.019)  | 0.123<br>(0.028)  | 0.087<br>(0.027)  | -0.036<br>(0.038) | 0.341           |
| O-level failure rate for school | 0.557<br>(0.026)  | 0.565<br>(0.025)  | 0.549<br>(0.047)  | -0.016<br>(0.052) | 0.754           |
| Number of schools               | 42                | 22                | 20                |                   |                 |
| Number of individuals           | 284               | 146               | 138               |                   |                 |

*Note:* For details, see Table 2. Joint *p*-value of the explanatory variables in a regression predicting treatment on background variables:  $p = 0.002$ .

**Table A6:** Impact on exposure to the edutainment show, overall impact, full model

|                                 | Content question<br>(Incentivized) |                      | Episodes watched<br>(Non-incentivized) |                      |
|---------------------------------|------------------------------------|----------------------|----------------------------------------|----------------------|
|                                 | Edutainment                        | Weekend movie        | Edutainment                            | Weekend movie        |
| Treated (edutainment)           | 1.063***<br>(0.087)                | -0.755***<br>(0.086) | 1.407***<br>(0.113)                    | -0.442***<br>(0.059) |
| Male                            | -0.172***<br>(0.060)               | -0.279***<br>(0.054) | -0.108*<br>(0.063)                     | -0.057<br>(0.044)    |
| Age                             | -0.074***<br>(0.019)               | -0.091***<br>(0.019) | -0.063**<br>(0.027)                    | -0.028<br>(0.018)    |
| Household with no parents       | 0.034<br>(0.052)                   | -0.050<br>(0.054)    | -0.004<br>(0.053)                      | -0.001<br>(0.036)    |
| Access to TV                    | 0.068***<br>(0.022)                | 0.070***<br>(0.021)  | 0.056**<br>(0.027)                     | 0.037**<br>(0.018)   |
| Business stream                 | 0.077<br>(0.071)                   | 0.018<br>(0.073)     | 0.181**<br>(0.088)                     | 0.004<br>(0.054)     |
| Business knowledge              | 0.020<br>(0.046)                   | 0.131**<br>(0.056)   | -0.079<br>(0.070)                      | -0.043<br>(0.038)    |
| Business ambitions              | -0.005<br>(0.078)                  | -0.133*<br>(0.074)   | -0.054<br>(0.081)                      | 0.039<br>(0.068)     |
| O-level failure rate for school | -0.895***<br>(0.236)               | -0.599**<br>(0.274)  | -1.041***<br>(0.365)                   | -0.268<br>(0.193)    |
| Constant                        | 0.088<br>(0.065)                   | 0.143**<br>(0.068)   | 0.055<br>(0.081)                       | 0.029<br>(0.054)     |
| Observations                    | 1,915                              | 1,915                | 1,867                                  | 1,899                |
| R <sup>2</sup>                  | 0.206                              | 0.134                | 0.297                                  | 0.062                |

Note: Full version of panel A, Table 4. Standard errors in parentheses (\* :  $p < 0.10$ , \*\* :  $p < 0.05$ , \*\*\* :  $p < 0.01$ )

**Table A7:** Impact on exposure to the edutainment show, gender specific effects, full model

|                                 | Content question<br>(Incentivized) |                      | Episodes watched<br>(Non-incentivized) |                      |
|---------------------------------|------------------------------------|----------------------|----------------------------------------|----------------------|
|                                 | Edutainment                        | Weekend movie        | Edutainment                            | Weekend movie        |
| Treated (edutainment)           | 1.021***<br>(0.109)                | -0.750***<br>(0.078) | 1.350***<br>(0.125)                    | -0.429***<br>(0.075) |
| Treated × Male                  | 0.098<br>(0.121)                   | -0.011<br>(0.104)    | 0.133<br>(0.126)                       | -0.030<br>(0.083)    |
| Male                            | -0.215***<br>(0.079)               | -0.274***<br>(0.083) | -0.167**<br>(0.081)                    | -0.043<br>(0.070)    |
| Age                             | -0.073***<br>(0.019)               | -0.091***<br>(0.019) | -0.063**<br>(0.027)                    | -0.028<br>(0.018)    |
| Household with no parents       | 0.033<br>(0.052)                   | -0.050<br>(0.054)    | -0.004<br>(0.053)                      | -0.001<br>(0.036)    |
| Access to TV                    | 0.069***<br>(0.021)                | 0.070***<br>(0.021)  | 0.057**<br>(0.027)                     | 0.037**<br>(0.018)   |
| Business stream                 | 0.074<br>(0.071)                   | 0.019<br>(0.072)     | 0.178**<br>(0.088)                     | 0.005<br>(0.053)     |
| Business knowledge              | 0.021<br>(0.046)                   | 0.131**<br>(0.056)   | -0.078<br>(0.071)                      | -0.044<br>(0.039)    |
| Business ambitions              | -0.007<br>(0.079)                  | -0.133*<br>(0.074)   | -0.057<br>(0.081)                      | 0.040<br>(0.068)     |
| O-level failure rate for school | -0.892***<br>(0.232)               | -0.600**<br>(0.273)  | -1.038***<br>(0.364)                   | -0.269<br>(0.192)    |
| Constant                        | 0.111<br>(0.072)                   | 0.140**<br>(0.068)   | 0.085<br>(0.084)                       | 0.022<br>(0.063)     |
| Observations                    | 1,915                              | 1,915                | 1,867                                  | 1,899                |
| R <sup>2</sup>                  | 0.206                              | 0.134                | 0.298                                  | 0.062                |

Note: Full version of panel B, Table 4. Standard errors in parentheses (\* :  $p < 0.10$ , \*\* :  $p < 0.05$ , \*\*\* :  $p < 0.01$ )

**Table A8:** Impact on ambitions, overall impact, full model

|                                 | Demand for business training |                   |                     |                     |                    |                     |                               | Ambition index      |                     |                     |                     |
|---------------------------------|------------------------------|-------------------|---------------------|---------------------|--------------------|---------------------|-------------------------------|---------------------|---------------------|---------------------|---------------------|
|                                 | Main                         |                   |                     | Incentivized        |                    |                     | Rating of having own business |                     |                     |                     |                     |
|                                 | # of courses                 | any courses       | Self-report         | # of courses        | any courses        | Self-report         |                               |                     |                     |                     |                     |
| Treated (edutainment)           | 0.038<br>(0.028)             | 0.084<br>(0.071)  | 0.080<br>(0.072)    | 0.046<br>(0.048)    | 0.042<br>(0.049)   | 0.134***<br>(0.033) | 0.123***<br>(0.029)           | 0.155**<br>(0.062)  | 0.150**<br>(0.061)  | 0.279***<br>(0.084) | 0.264***<br>(0.078) |
| Male                            | 0.003<br>(0.014)             | -0.005<br>(0.017) | -0.034<br>(0.035)   | -0.037<br>(0.027)   | -0.046*<br>(0.027) | -0.058**<br>(0.024) | -0.044*<br>(0.026)            | -0.019<br>(0.052)   | -0.007<br>(0.053)   | -0.078<br>(0.059)   | -0.061<br>(0.061)   |
| Age                             | 0.007<br>(0.006)             | 0.020<br>(0.016)  | 0.020<br>(0.016)    | 0.013<br>(0.012)    | 0.013<br>(0.012)   | -0.009<br>(0.011)   | -0.009<br>(0.011)             | -0.005<br>(0.019)   | -0.005<br>(0.019)   | -0.004<br>(0.020)   |                     |
| Household with no parents       | -0.008<br>(0.014)            | 0.019<br>(0.034)  | 0.019<br>(0.034)    | 0.027<br>(0.026)    | 0.027<br>(0.026)   | 0.064**<br>(0.026)  | 0.064**<br>(0.026)            | 0.008<br>(0.044)    | 0.008<br>(0.044)    | 0.073*<br>(0.041)   |                     |
| Access to TV                    | 0.001<br>(0.005)             | -0.001<br>(0.013) | -0.001<br>(0.013)   | -0.002<br>(0.010)   | -0.002<br>(0.010)  | 0.008<br>(0.011)    | 0.008<br>(0.011)              | 0.027<br>(0.023)    | 0.027<br>(0.023)    | 0.028<br>(0.027)    |                     |
| Business stream                 | -0.018<br>(0.026)            | 0.000<br>(0.070)  | 0.000<br>(0.070)    | 0.018<br>(0.050)    | 0.018<br>(0.050)   | 0.057**<br>(0.028)  | 0.057**<br>(0.028)            | 0.033<br>(0.064)    | 0.033<br>(0.064)    | 0.070<br>(0.075)    |                     |
| Business knowledge              | 0.004<br>(0.019)             | 0.019<br>(0.036)  | 0.019<br>(0.036)    | 0.014<br>(0.022)    | 0.014<br>(0.022)   | 0.028<br>(0.025)    | 0.028<br>(0.025)              | 0.105*<br>(0.056)   | 0.105*<br>(0.056)   | 0.143**<br>(0.061)  |                     |
| Business ambitions              | 0.027<br>(0.027)             | 0.057<br>(0.058)  | 0.057<br>(0.058)    | 0.030<br>(0.041)    | 0.030<br>(0.041)   | 0.072**<br>(0.034)  | 0.072**<br>(0.034)            | 0.143*<br>(0.078)   | 0.143*<br>(0.078)   | 0.200***<br>(0.077) |                     |
| O-level failure rate for school | 0.006<br>(0.081)             | 0.098<br>(0.197)  | 0.098<br>(0.197)    | 0.092<br>(0.132)    | 0.092<br>(0.132)   | -0.260**<br>(0.102) | -0.260**<br>(0.102)           | -0.105<br>(0.160)   | -0.105<br>(0.160)   | -0.495**<br>(0.239) |                     |
| Constant                        | 0.077***<br>(0.016)          | -0.046<br>(0.115) | 0.467***<br>(0.052) | 0.390***<br>(0.040) | 0.100<br>(0.219)   | 0.603***<br>(0.030) | 0.836***<br>(0.195)           | 2.786***<br>(0.063) | 2.774***<br>(0.335) | 1.250***<br>(0.074) | 1.404***<br>(0.344) |
| Observations                    | 1,915                        | 1,902             | 1,915               | 1,915               | 1,902              | 1,910               | 1,897                         | 1,863               | 1,851               | 1,859               | 1,847               |
| R <sup>2</sup>                  | 0.004                        | 0.007             | 0.005               | 0.004               | 0.008              | 0.025               | 0.043                         | 0.007               | 0.013               | 0.022               | 0.039               |

Note: Full version of panel A, Table 5. Standard errors in parentheses are clustered on schools (\* :  $p < 0.10$ , \*\* :  $p < 0.05$ , \*\*\* :  $p < 0.01$ ). Variant definitions of incentivized demand for business training (columns 3–6) is first the count (0,1,2) of courses demanded and then an indicator for whether any courses are demanded.

**Table A9:** Impact on ambitions, gender specific impact, full model

|                                 | Demand for business training |                   |                     |                     |                   |                     | Ambition index      |                     |                     |
|---------------------------------|------------------------------|-------------------|---------------------|---------------------|-------------------|---------------------|---------------------|---------------------|---------------------|
|                                 | Main                         |                   |                     | Incentivized        |                   |                     |                     |                     |                     |
|                                 | # of courses                 | any courses       | Self-report         | own business        | Ambition index    |                     |                     |                     |                     |
| Treated (edutainment)           | 0.060*<br>(0.033)            | 0.127<br>(0.087)  | 0.118<br>(0.085)    | 0.067<br>(0.061)    | 0.060<br>(0.060)  | 0.112***<br>(0.039) | 0.121<br>(0.084)    | 0.268**<br>(0.105)  | 0.259**<br>(0.107)  |
| Treated × Male                  | -0.049*<br>(0.027)           | -0.098<br>(0.071) | -0.089<br>(0.069)   | -0.049<br>(0.055)   | -0.044<br>(0.054) | 0.039<br>(0.046)    | 0.070<br>(0.104)    | 0.069<br>(0.103)    | 0.025<br>(0.114)    |
| Male                            | 0.025<br>(0.016)             | 0.009<br>(0.045)  | -0.011<br>(0.047)   | -0.016<br>(0.037)   | -0.027<br>(0.036) | -0.075*<br>(0.039)  | -0.050<br>(0.071)   | -0.039<br>(0.071)   | -0.089<br>(0.091)   |
| Age                             | 0.007<br>(0.006)             | 0.019<br>(0.016)  | 0.012<br>(0.012)    | 0.012<br>(0.012)    | 0.012<br>(0.012)  | -0.009<br>(0.011)   | -0.004<br>(0.019)   | -0.004<br>(0.019)   | -0.004<br>(0.020)   |
| Household with no parents       | -0.008<br>(0.014)            | 0.020<br>(0.034)  | 0.028<br>(0.026)    | 0.028<br>(0.026)    | 0.028<br>(0.026)  | 0.064**<br>(0.026)  | 0.007<br>(0.044)    | 0.007<br>(0.044)    | 0.073*<br>(0.041)   |
| Access to TV                    | 0.001<br>(0.005)             | -0.001<br>(0.013) | -0.002<br>(0.010)   | -0.002<br>(0.010)   | -0.002<br>(0.010) | 0.008<br>(0.011)    | 0.028<br>(0.023)    | 0.028<br>(0.023)    | 0.028<br>(0.027)    |
| Business stream                 | -0.016<br>(0.026)            | 0.003<br>(0.069)  | 0.020<br>(0.049)    | 0.020<br>(0.049)    | 0.020<br>(0.049)  | 0.057**<br>(0.028)  | 0.031<br>(0.063)    | 0.031<br>(0.063)    | 0.069<br>(0.074)    |
| Business knowledge              | 0.004<br>(0.019)             | 0.018<br>(0.036)  | 0.014<br>(0.022)    | 0.014<br>(0.022)    | 0.014<br>(0.022)  | 0.028<br>(0.025)    | 0.106*<br>(0.057)   | 0.106*<br>(0.057)   | 0.143**<br>(0.061)  |
| Business ambitions              | 0.028<br>(0.028)             | 0.059<br>(0.058)  | 0.031<br>(0.041)    | 0.031<br>(0.041)    | 0.031<br>(0.041)  | 0.071**<br>(0.034)  | 0.141*<br>(0.078)   | 0.141*<br>(0.078)   | 0.200***<br>(0.077) |
| O-level failure rate for school | 0.005<br>(0.079)             | 0.096<br>(0.193)  | 0.091<br>(0.131)    | 0.091<br>(0.131)    | 0.091<br>(0.131)  | -0.259**<br>(0.101) | -0.104<br>(0.158)   | -0.104<br>(0.158)   | -0.495**<br>(0.239) |
| Constant                        | 0.066***<br>(0.016)          | -0.050<br>(0.114) | 0.445***<br>(0.057) | 0.379***<br>(0.045) | 0.096<br>(0.222)  | 0.612***<br>(0.034) | 2.802***<br>(0.073) | 2.780***<br>(0.335) | 1.255***<br>(0.083) |
| Observations                    | 1,915                        | 1,902             | 1,902               | 1,915               | 1,902             | 1,910               | 1,863               | 1,851               | 1,847               |
| R <sup>2</sup>                  | 0.006                        | 0.008             | 0.006               | 0.005               | 0.008             | 0.026               | 0.007               | 0.014               | 0.039               |

*Note:* Full version of panel B, Table 5. Standard errors in parentheses are clustered on schools (\* :  $p < 0.10$ , \*\* :  $p < 0.05$ , \*\*\* :  $p < 0.01$ ). Variant definitions of incentivized demand for business training (columns 3–6) is first the count (0,1,2) of courses demanded and then an indicator for whether any courses are demanded.

**Table A10:** Impact on knowledge, overall impact, full model

|                                 | Subindices          |                     |                     |                     |                     |                     |                     | Knowledge index      |                     |                      |
|---------------------------------|---------------------|---------------------|---------------------|---------------------|---------------------|---------------------|---------------------|----------------------|---------------------|----------------------|
|                                 | Macro               |                     | Business:           |                     |                     |                     |                     |                      |                     |                      |
|                                 | Facts               | Facts               | Facts               | Concepts            | Practice            | Practice            |                     |                      |                     |                      |
| Treated (edutainment)           | 0.105<br>(0.077)    | 0.101<br>(0.077)    | 0.055<br>(0.040)    | 0.045<br>(0.037)    | -0.126<br>(0.090)   | -0.146*<br>(0.078)  | -0.034<br>(0.130)   | -0.068<br>(0.111)    | 0.001<br>(0.246)    | -0.068<br>(0.204)    |
| Male                            | 0.308***<br>(0.057) | 0.354***<br>(0.061) | -0.068*<br>(0.035)  | -0.055<br>(0.036)   | 0.117**<br>(0.054)  | 0.172***<br>(0.052) | 0.064<br>(0.086)    | 0.181**<br>(0.085)   | 0.420***<br>(0.151) | 0.652***<br>(0.154)  |
| Age                             |                     | -0.053*<br>(0.029)  |                     | -0.020<br>(0.018)   |                     | 0.006<br>(0.016)    |                     | -0.098***<br>(0.037) |                     | -0.165***<br>(0.059) |
| Household with no parents       |                     | 0.130*<br>(0.073)   |                     | 0.033<br>(0.037)    |                     | -0.005<br>(0.049)   |                     | 0.041<br>(0.090)     |                     | 0.199<br>(0.142)     |
| Access to TV                    |                     | -0.043*<br>(0.026)  |                     | 0.003<br>(0.016)    |                     | 0.021<br>(0.018)    |                     | 0.041<br>(0.036)     |                     | 0.022<br>(0.059)     |
| Business stream                 |                     | 0.072<br>(0.072)    |                     | 0.043<br>(0.039)    |                     | 0.260***<br>(0.087) |                     | 0.235**<br>(0.109)   |                     | 0.611***<br>(0.205)  |
| Business knowledge              |                     | 0.080<br>(0.074)    |                     | -0.032<br>(0.032)   |                     | 0.027<br>(0.047)    |                     | -0.006<br>(0.091)    |                     | 0.069<br>(0.130)     |
| Business ambitions              |                     | 0.006<br>(0.097)    |                     | 0.058<br>(0.058)    |                     | -0.149**<br>(0.064) |                     | -0.076<br>(0.123)    |                     | -0.161<br>(0.203)    |
| O-level failure rate for school |                     | -0.191<br>(0.296)   |                     | -0.202**<br>(0.095) |                     | -0.622**<br>(0.248) |                     | -1.144***<br>(0.280) |                     | -2.159***<br>(0.746) |
| Constant                        | 2.046***<br>(0.056) | 3.151***<br>(0.469) | 0.890***<br>(0.041) | 1.323***<br>(0.322) | 1.449***<br>(0.071) | 1.519***<br>(0.286) | 4.016***<br>(0.097) | 6.152***<br>(0.657)  | 8.401***<br>(0.165) | 12.145***<br>(1.021) |
| Observations                    | 1,915               | 1,902               | 1,915               | 1,902               | 1,915               | 1,902               | 1,915               | 1,902                | 1,915               | 1,902                |
| R <sup>2</sup>                  | 0.014               | 0.020               | 0.004               | 0.010               | 0.011               | 0.047               | 0.001               | 0.026                | 0.006               | 0.041                |

Note: Full version of panel A, Table 6. Standard errors in parentheses are clustered on schools (\* :  $p < 0.10$ , \*\* :  $p < 0.05$ , \*\*\* :  $p < 0.01$ )

**Table A11:** Impact on knowledge, gender specific impact, full model

|                                 | Subindices          |                     |                     |                     |                     |                     |                     |                      |                      |
|---------------------------------|---------------------|---------------------|---------------------|---------------------|---------------------|---------------------|---------------------|----------------------|----------------------|
|                                 | Macro               |                     |                     | Business:           |                     |                     |                     |                      |                      |
|                                 | Facts               | Facts               | Facts               | Concepts            | Practice            | Knowledge index     |                     |                      |                      |
| Treated (edutainment)           | 0.029<br>(0.096)    | 0.035<br>(0.094)    | 0.048<br>(0.055)    | 0.045<br>(0.055)    | -0.163<br>(0.111)   | -0.168*<br>(0.099)  | -0.111<br>(0.138)   | -0.192<br>(0.292)    | -0.199<br>(0.243)    |
| Treated × Male                  | 0.176<br>(0.111)    | 0.154<br>(0.113)    | 0.018<br>(0.069)    | -0.001<br>(0.066)   | 0.086<br>(0.108)    | 0.052<br>(0.108)    | 0.101<br>(0.159)    | 0.446<br>(0.296)     | 0.306<br>(0.284)     |
| Male                            | 0.229***<br>(0.075) | 0.284***<br>(0.078) | -0.076<br>(0.050)   | -0.055<br>(0.054)   | 0.079<br>(0.075)    | 0.148**<br>(0.069)  | -0.010<br>(0.114)   | 0.136<br>(0.110)     | 0.513***<br>(0.188)  |
| Age                             |                     | -0.052*<br>(0.029)  |                     | -0.020<br>(0.018)   |                     | 0.006<br>(0.016)    |                     | -0.097***<br>(0.038) | -0.163***<br>(0.059) |
| Household with no parents       |                     | 0.129*<br>(0.073)   |                     | 0.033<br>(0.037)    |                     | -0.005<br>(0.049)   |                     | 0.040<br>(0.090)     | 0.198<br>(0.142)     |
| Access to TV                    |                     | -0.043<br>(0.026)   |                     | 0.003<br>(0.016)    |                     | 0.022<br>(0.018)    |                     | 0.041<br>(0.036)     | 0.023<br>(0.059)     |
| Business stream                 |                     | 0.067<br>(0.072)    |                     | 0.043<br>(0.040)    |                     | 0.258***<br>(0.087) |                     | 0.232**<br>(0.108)   | 0.600***<br>(0.204)  |
| Business knowledge              |                     | 0.082<br>(0.073)    |                     | -0.032<br>(0.032)   |                     | 0.028<br>(0.047)    |                     | -0.004<br>(0.091)    | 0.074<br>(0.129)     |
| Business ambitions              |                     | 0.002<br>(0.098)    |                     | 0.058<br>(0.058)    |                     | -0.150**<br>(0.064) |                     | -0.079<br>(0.122)    | -0.169<br>(0.205)    |
| O-level failure rate for school |                     | -0.188<br>(0.287)   |                     | -0.202**<br>(0.096) |                     | -0.621**<br>(0.246) |                     | -1.142***<br>(0.276) | -2.153***<br>(0.731) |
| Constant                        | 2.086***<br>(0.063) | 3.165***<br>(0.463) | 0.894***<br>(0.049) | 1.325***<br>(0.321) | 1.469***<br>(0.078) | 1.524***<br>(0.285) | 4.054***<br>(0.110) | 6.161***<br>(0.658)  | 8.503***<br>(0.181)  |
| Observations                    | 1,915               | 1,902               | 1,915               | 1,902               | 1,915               | 1,902               | 1,915               | 1,902                | 1,902                |
| R <sup>2</sup>                  | 0.015               | 0.021               | 0.004               | 0.010               | 0.012               | 0.047               | 0.001               | 0.027                | 0.042                |

Note: Full version of panel B, Table 6. Standard errors in parentheses (\* :  $p < 0.10$ , \*\* :  $p < 0.05$ , \*\*\* :  $p < 0.01$ )

**Table A12:** Impact on mind-set, overall impact, full model

|                                 | Risk                |                     | Patience             |                     | Compete             |                    | Mind-set index      |                     |
|---------------------------------|---------------------|---------------------|----------------------|---------------------|---------------------|--------------------|---------------------|---------------------|
| Treated (edutainment)           | 0.075<br>(0.064)    | 0.083<br>(0.063)    | 0.072<br>(0.153)     | 0.078<br>(0.150)    | -0.005<br>(0.095)   | -0.020<br>(0.091)  | 0.082<br>(0.110)    | 0.072<br>(0.109)    |
| Male                            | 0.028<br>(0.039)    | 0.023<br>(0.039)    | -0.227***<br>(0.086) | -0.172**<br>(0.083) | 0.041<br>(0.045)    | 0.046<br>(0.040)   | -0.017<br>(0.067)   | 0.006<br>(0.065)    |
| Age                             |                     | -0.006<br>(0.014)   |                      | -0.019<br>(0.030)   |                     | 0.023<br>(0.016)   |                     | 0.015<br>(0.024)    |
| Household with no parents       |                     | 0.027<br>(0.048)    |                      | -0.052<br>(0.082)   |                     | -0.032<br>(0.022)  |                     | -0.037<br>(0.054)   |
| Access to TV                    |                     | 0.010<br>(0.019)    |                      | -0.038<br>(0.040)   |                     | -0.010<br>(0.016)  |                     | -0.017<br>(0.030)   |
| Business stream                 |                     | -0.088<br>(0.063)   |                      | 0.198<br>(0.163)    |                     | 0.109<br>(0.088)   |                     | 0.135<br>(0.100)    |
| Business knowledge              |                     | 0.117***<br>(0.034) |                      | -0.037<br>(0.079)   |                     | -0.062*<br>(0.036) |                     | 0.004<br>(0.063)    |
| Business ambitions              |                     | 0.069<br>(0.057)    |                      | -0.215**<br>(0.100) |                     | -0.060<br>(0.038)  |                     | -0.098<br>(0.070)   |
| O-level failure rate for school |                     | 0.115<br>(0.182)    |                      | 0.040<br>(0.428)    |                     | -0.452<br>(0.297)  |                     | -0.425<br>(0.333)   |
| Constant                        | 1.314***<br>(0.053) | 1.309***<br>(0.286) | 3.491***<br>(0.127)  | 3.878***<br>(0.588) | 0.354***<br>(0.081) | 0.228<br>(0.363)   | 2.772***<br>(0.094) | 2.768***<br>(0.456) |
| Observations                    | 1,915               | 1,902               | 1,915                | 1,902               | 1,914               | 1,901              | 1,914               | 1,901               |
| R <sup>2</sup>                  | 0.003               | 0.012               | 0.006                | 0.013               | 0.002               | 0.038              | 0.002               | 0.011               |

Note: Full version of panel A, Table 7. Standard errors in parentheses (\* :  $p < 0.10$ , \*\* :  $p < 0.05$ , \*\*\* :  $p < 0.01$ )

**Table A13:** Impact on mind-set, gender specific impact, full model

|                                 | Risk                | Patience            | Compete             | Mind-set index      |
|---------------------------------|---------------------|---------------------|---------------------|---------------------|
| Treated (education)             | 0.146**<br>(0.073)  | 0.144<br>(0.193)    | -0.045<br>(0.111)   | 0.120<br>(0.132)    |
| Treated × Male                  | -0.165**<br>(0.074) | -0.167<br>(0.175)   | 0.092<br>(0.084)    | -0.089<br>(0.133)   |
| Male                            | 0.102**<br>(0.049)  | -0.153<br>(0.104)   | -0.000<br>(0.070)   | 0.022<br>(0.096)    |
| Age                             | -0.007<br>(0.014)   | -0.021<br>(0.030)   | 0.023<br>(0.016)    | 0.014<br>(0.024)    |
| Household with no parents       | 0.028<br>(0.047)    | -0.050<br>(0.082)   | -0.033<br>(0.022)   | -0.037<br>(0.054)   |
| Access to TV                    | 0.009<br>(0.018)    | -0.038<br>(0.039)   | -0.010<br>(0.016)   | -0.017<br>(0.030)   |
| Business stream                 | -0.083<br>(0.062)   | 0.205<br>(0.161)    | 0.106<br>(0.087)    | 0.139<br>(0.100)    |
| Business knowledge              | 0.115***<br>(0.034) | -0.041<br>(0.079)   | -0.061*<br>(0.035)  | 0.002<br>(0.062)    |
| Business ambitions              | 0.073<br>(0.056)    | -0.210**<br>(0.098) | -0.062*<br>(0.038)  | -0.096<br>(0.069)   |
| O-level failure rate for school | 0.112<br>(0.175)    | 0.036<br>(0.423)    | -0.450<br>(0.295)   | -0.427<br>(0.335)   |
| Constant                        | 1.277***<br>(0.056) | 3.453***<br>(0.138) | 0.375***<br>(0.090) | 2.752***<br>(0.106) |
| Observations                    | 1,915               | 1,915               | 1,914               | 1,901               |
| R <sup>2</sup>                  | 0.006               | 0.007               | 0.004               | 0.002               |

Note: Full version of panel B, Table 7. Standard errors in parentheses (\* :  $p < 0.10$ , \*\* :  $p < 0.05$ , \*\*\* :  $p < 0.01$ ).

**Table A14:** Mind-set: Ordered probit models of risk-taking

|                                 | (1)               | (2)                 | (3)                 | (4)                 |
|---------------------------------|-------------------|---------------------|---------------------|---------------------|
| Treated (edutainment)           | 0.111<br>(0.095)  | 0.123<br>(0.095)    | 0.217**<br>(0.109)  | 0.215**<br>(0.104)  |
| Treated × Male                  |                   |                     | -0.246**<br>(0.110) | -0.215*<br>(0.112)  |
| Male                            | 0.046<br>(0.058)  | 0.040<br>(0.058)    | 0.156**<br>(0.074)  | 0.138*<br>(0.075)   |
| Age                             |                   | -0.012<br>(0.020)   |                     | -0.013<br>(0.020)   |
| Household with no parents       |                   | 0.041<br>(0.071)    |                     | 0.042<br>(0.071)    |
| Access to TV                    |                   | 0.014<br>(0.028)    |                     | 0.014<br>(0.028)    |
| Business stream                 |                   | -0.135<br>(0.094)   |                     | -0.127<br>(0.093)   |
| Business knowledge              |                   | 0.176***<br>(0.052) |                     | 0.173***<br>(0.051) |
| Business ambitions              |                   | 0.105<br>(0.084)    |                     | 0.111<br>(0.083)    |
| O-level failure rate for school |                   | 0.158<br>(0.273)    |                     | 0.154<br>(0.264)    |
| <b>Cutoffs:</b>                 |                   |                     |                     |                     |
| (0, 1)                          | -1.256<br>(0.085) | -1.315<br>(0.421)   | -1.202<br>(0.091)   | -1.298<br>(0.414)   |
| (1, 2)                          | 0.342<br>(0.085)  | 0.295<br>(0.425)    | 0.399<br>(0.090)    | 0.314<br>(0.418)    |
| (2, 3)                          | 1.624<br>(0.088)  | 1.588<br>(0.430)    | 1.684<br>(0.093)    | 1.609<br>(0.422)    |
| Observations                    | 1,915             | 1,902               | 1,915               | 1,902               |

*Note:* Ordered probit models of the number of risky decisions taken (0–3). Intercept of linear index normalized to zero. Standard errors in parentheses are clustered on schools (\* :  $p < 0.10$ , \*\* :  $p < 0.05$ , \*\*\* :  $p < 0.01$ ).

**Table A15:** Mind-set: Ordered probit models of patience

|                                 | (1)                  | (2)                 | (3)               | (4)                 |
|---------------------------------|----------------------|---------------------|-------------------|---------------------|
| Treated (edutainment)           | 0.048<br>(0.103)     | 0.053<br>(0.100)    | 0.095<br>(0.130)  | 0.114<br>(0.129)    |
| Treated × Male                  |                      |                     | -0.108<br>(0.117) | -0.143<br>(0.109)   |
| Male                            | -0.150***<br>(0.057) | -0.114**<br>(0.056) | -0.102<br>(0.069) | -0.049<br>(0.058)   |
| Age                             |                      | -0.013<br>(0.020)   |                   | -0.014<br>(0.020)   |
| Household with no parents       |                      | -0.037<br>(0.054)   |                   | -0.037<br>(0.055)   |
| Access to TV                    |                      | -0.025<br>(0.026)   |                   | -0.025<br>(0.026)   |
| Business stream                 |                      | 0.132<br>(0.109)    |                   | 0.137<br>(0.109)    |
| Business knowledge              |                      | -0.027<br>(0.052)   |                   | -0.029<br>(0.052)   |
| Business ambitions              |                      | -0.142**<br>(0.066) |                   | -0.138**<br>(0.065) |
| O-level failure rate for school |                      | 0.030<br>(0.284)    |                   | 0.027<br>(0.281)    |
| <b>Cutoffs:</b>                 |                      |                     |                   |                     |
| (0,1)                           | -1.770<br>(0.116)    | -2.031<br>(0.371)   | -1.746<br>(0.123) | -2.019<br>(0.373)   |
| (1,2)                           | -1.353<br>(0.095)    | -1.619<br>(0.378)   | -1.320<br>(0.103) | -1.607<br>(0.380)   |
| (2,3)                           | -0.645<br>(0.080)    | -0.905<br>(0.386)   | -0.620<br>(0.087) | -0.892<br>(0.387)   |
| (3,4)                           | 0.009<br>(0.086)     | -0.250<br>(0.392)   | 0.033<br>(0.093)  | -0.237<br>(0.393)   |
| (4,5)                           | 0.685<br>(0.091)     | 0.426<br>(0.393)    | 0.710<br>(0.097)  | 0.439<br>(0.395)    |
| (5,6)                           | 1.111<br>(0.101)     | 0.857<br>(0.399)    | 1.136<br>(0.107)  | 0.870<br>(0.400)    |
| Observations                    | 1,915                | 1,902               | 1,915             | 1,902               |

*Note:* Ordered probit models of the number of times participants waited for higher returns (0–6). Intercept of linear index normalized to zero. Standard errors in parentheses are clustered on schools (\*:  $p < 0.10$ , \*\*:  $p < 0.05$ , \*\*\*:  $p < 0.01$ ).

**Table A16:** Long-term behavior, overall impact, full model

|                                 | Long-term survey    |                      |                      |                     |                     |                     |
|---------------------------------|---------------------|----------------------|----------------------|---------------------|---------------------|---------------------|
|                                 | Administrative      | Passed final exam    | Currently a student  | Started a business  | Currently employed  | Moved               |
| Treated (edutainment)           | -0.182**<br>(0.078) | -0.198***<br>(0.059) | -0.210***<br>(0.072) | 0.043<br>(0.054)    | -0.051<br>(0.048)   | 0.111**<br>(0.056)  |
| Male                            | 0.022<br>(0.033)    | 0.102***<br>(0.029)  | -0.072<br>(0.071)    | -0.020<br>(0.061)   | -0.037<br>(0.039)   | -0.107*<br>(0.054)  |
| Age                             |                     | -0.060***<br>(0.009) | -0.095***<br>(0.025) | -0.006<br>(0.028)   | 0.004<br>(0.019)    | 0.038<br>(0.028)    |
| Household with no parents       |                     | 0.043*<br>(0.023)    | -0.049<br>(0.053)    | -0.065<br>(0.069)   | 0.033<br>(0.046)    | 0.206***<br>(0.064) |
| Access to TV                    |                     | -0.006<br>(0.012)    | -0.040*<br>(0.023)   | -0.012<br>(0.025)   | -0.011<br>(0.025)   | -0.001<br>(0.026)   |
| Business stream                 |                     | 0.111*<br>(0.058)    | -0.000<br>(0.070)    | -0.030<br>(0.059)   | -0.001<br>(0.055)   | 0.005<br>(0.055)    |
| Business knowledge              |                     | 0.058**<br>(0.029)   | 0.049<br>(0.063)     | 0.031<br>(0.066)    | -0.010<br>(0.034)   | -0.049<br>(0.070)   |
| Business ambitions              |                     | -0.087**<br>(0.034)  | -0.031<br>(0.092)    | -0.007<br>(0.102)   | 0.101<br>(0.075)    | -0.085<br>(0.076)   |
| O-level failure rate for school |                     | -0.894***<br>(0.192) | -0.394*<br>(0.210)   | 0.361**<br>(0.173)  | 0.072<br>(0.085)    | -0.410**<br>(0.165) |
| Constant                        | 0.644***<br>(0.060) | 2.159***<br>(0.181)  | 0.644***<br>(0.055)  | 0.279***<br>(0.046) | 0.162***<br>(0.041) | 0.243***<br>(0.039) |
| Observations                    | 2,039               | 2,029                | 284                  | 282                 | 282                 | 279                 |
| R <sup>2</sup>                  | 0.035               | 0.162                | 0.047                | 0.003               | 0.009               | 0.023               |

Note: Full version of panel A, Table 8. Standard errors in parentheses (\* :  $p < 0.10$ , \*\* :  $p < 0.05$ , \*\*\* :  $p < 0.01$ )

**Table A17:** Long-term behavior, gender specific impact, full model

|                                 | Administrative       |                      | Long-term survey    |                     |                      |                      |  |
|---------------------------------|----------------------|----------------------|---------------------|---------------------|----------------------|----------------------|--|
|                                 | Passed final exam    | Currently a student  | Started a business  | Currently employed  | Moved                |                      |  |
| Treated (edutainment)           | -0.227***<br>(0.084) | -0.124<br>(0.076)    | 0.092<br>(0.070)    | -0.073<br>(0.063)   | 0.136**<br>(0.069)   | 0.104<br>(0.077)     |  |
| Treated × Male                  | 0.103<br>(0.064)     | -0.192<br>(0.139)    | -0.110<br>(0.123)   | 0.050<br>(0.077)    | -0.058<br>(0.081)    | -0.089<br>(0.093)    |  |
| Male                            | -0.026<br>(0.047)    | 0.020<br>(0.078)     | 0.032<br>(0.068)    | -0.061<br>(0.060)   | -0.058<br>(0.057)    | -0.065<br>(0.075)    |  |
| Age                             | -0.060***<br>(0.009) | -0.089***<br>(0.026) | -0.004<br>(0.029)   | 0.003<br>(0.019)    | 0.040<br>(0.028)     | 0.040<br>(0.028)     |  |
| Household with no parents       | 0.043*<br>(0.023)    | -0.050<br>(0.053)    | -0.065<br>(0.069)   | 0.033<br>(0.045)    | 0.206***<br>(0.064)  | 0.206***<br>(0.064)  |  |
| Access to TV                    | -0.006<br>(0.012)    | -0.041*<br>(0.023)   | -0.012<br>(0.025)   | -0.010<br>(0.025)   | -0.001<br>(0.026)    | -0.001<br>(0.026)    |  |
| Business stream                 | 0.108*<br>(0.057)    | 0.014<br>(0.067)     | -0.026<br>(0.055)   | -0.006<br>(0.056)   | 0.012<br>(0.056)     | 0.012<br>(0.056)     |  |
| Business knowledge              | 0.059**<br>(0.029)   | 0.045<br>(0.064)     | 0.030<br>(0.066)    | -0.009<br>(0.033)   | -0.051<br>(0.069)    | -0.051<br>(0.069)    |  |
| Business ambitions              | -0.089***<br>(0.034) | -0.030<br>(0.088)    | -0.007<br>(0.102)   | 0.101<br>(0.076)    | -0.085<br>(0.075)    | -0.085<br>(0.075)    |  |
| O-level failure rate for school | -0.894***<br>(0.190) | -0.434**<br>(0.187)  | 0.349**<br>(0.172)  | 0.086<br>(0.089)    | -0.428***<br>(0.165) | -0.428***<br>(0.165) |  |
| Constant                        | 0.669***<br>(0.064)  | 0.600***<br>(0.056)  | 0.253***<br>(0.046) | 0.173***<br>(0.047) | 0.230***<br>(0.046)  | -0.272<br>(0.448)    |  |
| Observations                    | 2,039                | 284                  | 282                 | 282                 | 279                  | 279                  |  |
| R <sup>2</sup>                  | 0.038                | 0.056                | 0.007               | 0.010               | 0.025                | 0.028                |  |

Note: Full version of panel B, Table 8. Standard errors in parentheses (\* :  $p < 0.10$ , \*\* :  $p < 0.05$ , \*\*\* :  $p < 0.01$ )

**Table A18: Impact on social preferences**

|                                                                     | Incentivized       |                       | Unfairness<br>of salary<br>inequality |
|---------------------------------------------------------------------|--------------------|-----------------------|---------------------------------------|
|                                                                     | Money for<br>self  | Proportional<br>bonus |                                       |
| <b>Panel A: Overall impact</b>                                      |                    |                       |                                       |
| Treated (edutainment)                                               | 0.006<br>(0.018)   | 0.013<br>(0.035)      | 0.050<br>(0.076)                      |
| Observations                                                        | 1,902              | 1,902                 | 1,897                                 |
| $R^2$                                                               | 0.014              | 0.018                 | 0.005                                 |
| <b>Panel B: Gender specific impact</b>                              |                    |                       |                                       |
| Treated (edutainment)                                               | 0.022<br>(0.022)   | 0.035<br>(0.038)      | 0.024<br>(0.093)                      |
| Treated $\times$ Male                                               | -0.037*<br>(0.021) | -0.051<br>(0.045)     | 0.061<br>(0.116)                      |
| Male                                                                | 0.029*<br>(0.017)  | 0.078***<br>(0.030)   | -0.123<br>(0.079)                     |
| Treatment on Males                                                  | -0.015<br>(0.019)  | -0.016<br>(0.044)     | 0.085<br>(0.099)                      |
| Observations                                                        | 1,902              | 1,902                 | 1,897                                 |
| $R^2$                                                               | 0.016              | 0.019                 | 0.005                                 |
| <b>Panel C: Statistics on dependent variable (in control group)</b> |                    |                       |                                       |
| Mean                                                                | 0.619              | 0.728                 | 3.966                                 |
| Standard deviation                                                  | 0.212              | 0.445                 | 1.550                                 |

*Note:* The table reports linear regressions in which the dependent variable is: column 1, the share of money the participant allocated to him- or herself out of 2000 TSh in a real-effort dictator game; column 2, an indicator variable taking the value one if the participant in a spectator choice decided to divide proportionality (and not equally) in a spectator choice involving two other participants; column 3, the participant's response to an hypothetical question about whether an income difference between a teacher and a doctor is fair (1-5, 1-the income difference is completely fair, 5-the income difference is completely unfair). Treated: indicator variable for the participant being in the treatment group. Treated  $\times$  Male: interaction variable between Treated and Male. Male: indicator variable taking the value one if the participant is a male. Also included in the regressions but not reported are the other background variables reported in Table 2. See Tables A19 and A20 for full regressions including all controls. Treatment on Males: the linear combination of Treated and Treated  $\times$  Male. Standard errors in parentheses are clustered on schools (\* :  $p < 0.10$ , \*\* :  $p < 0.05$ , \*\*\* :  $p < 0.01$ ).

**Table A19:** Impact on social preferences, overall impact, full models

|                                 | Incentivized        |                      |                       |                      | Unfairness<br>of salary<br>inequality |                     |
|---------------------------------|---------------------|----------------------|-----------------------|----------------------|---------------------------------------|---------------------|
|                                 | Money for<br>self   |                      | Proportional<br>bonus |                      |                                       |                     |
| Treated (edutainment)           | 0.002<br>(0.017)    | 0.006<br>(0.018)     | 0.019<br>(0.037)      | 0.013<br>(0.035)     | 0.066<br>(0.079)                      | 0.050<br>(0.076)    |
| Male                            | 0.012<br>(0.011)    | 0.012<br>(0.013)     | 0.028<br>(0.021)      | 0.055**<br>(0.022)   | -0.117**<br>(0.058)                   | -0.095<br>(0.065)   |
| Age                             |                     | 0.004<br>(0.005)     |                       | -0.026***<br>(0.009) |                                       | -0.016<br>(0.031)   |
| Household with no parents       |                     | -0.027***<br>(0.009) |                       | 0.020<br>(0.024)     |                                       | 0.069<br>(0.076)    |
| Access to TV                    |                     | -0.002<br>(0.005)    |                       | -0.004<br>(0.011)    |                                       | -0.027<br>(0.029)   |
| Business stream                 |                     | -0.019<br>(0.017)    |                       | 0.039<br>(0.029)     |                                       | 0.041<br>(0.080)    |
| Business knowledge              |                     | 0.031**<br>(0.014)   |                       | -0.001<br>(0.024)    |                                       | -0.040<br>(0.083)   |
| Business ambitions              |                     | -0.036**<br>(0.015)  |                       | -0.008<br>(0.027)    |                                       | -0.045<br>(0.121)   |
| O-level failure rate for school |                     | -0.055<br>(0.040)    |                       | -0.264**<br>(0.121)  |                                       | -0.447**<br>(0.227) |
| Constant                        | 0.613***<br>(0.013) | 0.596***<br>(0.103)  | 0.714***<br>(0.022)   | 1.317***<br>(0.178)  | 4.026***<br>(0.067)                   | 4.641***<br>(0.605) |
| Observations                    | 1,915               | 1,902                | 1,915                 | 1,902                | 1,910                                 | 1,897               |
| $R^2$                           | 0.001               | 0.014                | 0.001                 | 0.018                | 0.002                                 | 0.005               |

Note: Full version of panel A, Table A18. Standard errors in parentheses are clustered on schools

(\* :  $p < 0.10$ , \*\* :  $p < 0.05$ , \*\*\* :  $p < 0.01$ )

**Table A20:** Impact on social preferences, gender-specific impact, full models

|                                 | Incentivized        |                      |                       |                      | Unfairness<br>of salary<br>inequality |                     |
|---------------------------------|---------------------|----------------------|-----------------------|----------------------|---------------------------------------|---------------------|
|                                 | Money for<br>self   |                      | Proportional<br>bonus |                      |                                       |                     |
| Treated (edutainment)           | 0.019<br>(0.021)    | 0.022<br>(0.022)     | 0.034<br>(0.040)      | 0.035<br>(0.038)     | 0.036<br>(0.095)                      | 0.024<br>(0.093)    |
| Treated × Male                  | −0.041*<br>(0.022)  | −0.037*<br>(0.021)   | −0.036<br>(0.043)     | −0.051<br>(0.045)    | 0.071<br>(0.117)                      | 0.061<br>(0.116)    |
| Male                            | 0.031*<br>(0.016)   | 0.029*<br>(0.017)    | 0.044<br>(0.028)      | 0.078***<br>(0.030)  | −0.149**<br>(0.072)                   | −0.123<br>(0.079)   |
| Age                             |                     | 0.003<br>(0.005)     |                       | −0.027***<br>(0.009) |                                       | −0.015<br>(0.031)   |
| Household with no parents       |                     | −0.027***<br>(0.009) |                       | 0.020<br>(0.024)     |                                       | 0.069<br>(0.076)    |
| Access to TV                    |                     | −0.002<br>(0.005)    |                       | −0.004<br>(0.011)    |                                       | −0.026<br>(0.029)   |
| Business stream                 |                     | −0.018<br>(0.017)    |                       | 0.040<br>(0.029)     |                                       | 0.039<br>(0.079)    |
| Business knowledge              |                     | 0.030**<br>(0.014)   |                       | −0.001<br>(0.024)    |                                       | −0.040<br>(0.083)   |
| Business ambitions              |                     | −0.035**<br>(0.015)  |                       | −0.006<br>(0.028)    |                                       | −0.047<br>(0.121)   |
| O-level failure rate for school |                     | −0.056<br>(0.038)    |                       | −0.265**<br>(0.119)  |                                       | −0.446**<br>(0.227) |
| Constant                        | 0.603***<br>(0.014) | 0.593***<br>(0.102)  | 0.705***<br>(0.024)   | 1.313***<br>(0.179)  | 4.042***<br>(0.071)                   | 4.647***<br>(0.601) |
| Observations                    | 1,915               | 1,902                | 1,915                 | 1,902                | 1,910                                 | 1,897               |
| R <sup>2</sup>                  | 0.003               | 0.016                | 0.002                 | 0.019                | 0.002                                 | 0.005               |

Note: Full version of panel B, Table A18. Standard errors in parentheses are clustered on schools

(\* :  $p < 0.10$ , \*\* :  $p < 0.05$ , \*\*\* :  $p < 0.01$ )

## References

- Lee, David S. (2009). "Training, wages, and sample selection: Estimating sharp bounds on treatment effects," *Review of Economic Studies*, 76(3): 1071–1102.
- Manski, Charles F. (1990). "Nonparametric bounds on treatment effects," *American Economic Review*, 80(2): 319–323.
